# Supplementary material for: Hypertrophy-Reduced Autophagy Causes Cardiac Dysfunction by Directly Impacting Cardiomyocyte Contractility
Source: PubMed Central journal article supplement (PMC8065800; doi:10.3390/cells10040805), 2021-04-04
Supplement: cells-10-00805-s001.pdf [file cells-10-00805-s001.pdf]

## SUPPLEMENTAL MATERIAL

### Hypertrophy-reduced autophagy causes cardiac dysfunction by directly impacting cardiomyocyte contractility

Christiane Ott, PhD\*, Tobias Jung, PhD, Sarah Brix, PhD, Cathleen John, PhD, Iris R. Betz, Anna-Foryst-Ludwig, PhD, Stefanie Deubel, Wolfgang M. Kuebler, Prof., Tilman Grune, Prof., Ulrich Kintscher, Prof., Jana Grune, PhD

#### Expanded materials & methods

- Supplemental Tables: 1-4
- Supplemental Figure 1-2

**Supplemental Table 1:** Echocardiography 5 Weeks after intervention (before start of treatment)

|                             | VEH      |            | RAPA      |               |
|-----------------------------|----------|------------|-----------|---------------|
|                             | SHAM     | TAC        | SHAM      | TAC           |
| No. of animals              | 7        | 9          | 6         | 9             |
| Pulse-Wave Doppler Analysis |          |            |           |               |
| Aortic Vel. desc [mm/s]     | -923±86  | -2766±180* | -938±189† | -2620±175*, ‡ |
| Aortic Vel. asc [mm/s]      | 1135±114 | 1332±83    | 1160±145  | 1285±99       |
| Aortic Peak Pressure [mmHg] | 3.6±0.7  | 31.5±3.8*  | 4.2±1.9†  | 28.4±4.1*, ‡  |
| Pressure Gradient P [mmHg]  | -1.9±1.3 | 24.2±3.7*  | -1.6±2.4† | 21.5±4.6*, ‡  |

**Mean±SEM. Two-Way-ANOVA followed by Bonferroni's-post test.p<0.05, \* vs. SHAM VEH-Group, †vs. TAC VEH-group, ‡vs. SHAM RAPA-group.** (First data analyses on SHAM/VEH and TAC/VEH groups were already published by us in (Grune et al., 2018 Cardiovasc Ultrasound) (PMID: 29966517).

**Supplemental Table 2:** Gravimetric data 10 weeks after intervention of heart failure cohort

| 1.                           | VEH        |             | RAPA       |             |
|------------------------------|------------|-------------|------------|-------------|
|                              | SHAM       | TAC         | SHAM       | TAC         |
| No. of animals               | 7          | 9           | 6          | 8           |
| <b>Physiological Data</b>    |            |             |            |             |
| BW week 5 <sup>a</sup> (g)   | 26.8 ± 0.2 | 27.5±0.3    | 26.4±0.4   | 26.8±0.4    |
| BW week 10 (g)               | 28.0±0.3   | 28.9±0.3    | 26.6±0.4†  | 27.0±0.5†   |
| <b>Necropsy Data</b>         |            |             |            |             |
| HW (mg)                      | 123.0±8.3  | 160.3±29.1* | 105.7±9.9† | 120.7±11.7† |
| HW/BW (mg/g)                 | 4.4±0.3    | 5.7±1*      | 4.0±0.3†   | 4.5±0.4†    |
| LW (g)                       | 193.6±38.3 | 178.4±44.2  | 189.3±40.1 | 194.6±25.3  |
| LW/BW (mg)                   | 6.9±1.4    | 6.4±1.6     | 7.1±1.4    | 7.2±0.9     |
| Spleen (g)                   | 74.3±22.3  | 90±17.8     | 65±18.7    | 73.3±20     |
| Spleen/BW (mg/g)             | 2.7±0.8    | 3.2±0.6     | 2.4±0.7    | 2.7±0.8     |
| <b>Blood Sample Analysis</b> |            |             |            |             |
| Glucose (mg/dl)              | 192.7±24.7 | 192.2±40.6  | 176.8±39.9 | 174.3±55.5  |
| <b>Tail Cuff Measurement</b> |            |             |            |             |
| SBP (mmHg)                   | 117.4±10.8 | 116.6±4.2   | 116.0±10.7 | 120.1±8.1   |

Mean±SEM. Two-Way-ANOVA followed by Bonferroni's-posttest  $p < 0.05$ ., \* vs. SHAM VEH-Group. † vs. TAC VEH-group. BW=Body weight; HW=Heart weight; LW=Lung weight; SBP=Systolic blood pressure, <sup>a</sup> BW before intervention.

**Supplemental Table 3: Antibody list**

| <b>Primary antibody</b>                                             | <b>Company/ article number</b> |
|---------------------------------------------------------------------|--------------------------------|
| Anti-3-Nitrotyrosine antibody, mouse                                | Abcam, ab110282                |
| Anti-SQSTM1 / p62 antibody mouse                                    | Abcam, ab56416                 |
| Anti-LC3A/B rabbit (D3U4C)                                          | Cell Signaling, #12741         |
| Anti-mTOR (7C10) rabbit                                             | Cell Signaling #2983S          |
| Anti-Phospho-p70 S6 kinase (Thr389) (108D2) rabbit                  | Cell Signaling, #9234          |
| Anti-p70 S6 Kinase (49D7) rabbit                                    | Cell Signaling, #2708          |
| Anti-Atg5 antibody, mouse (detecting Atg5 and Atg5-Atg12 conjugate) | NanoTools ATG5-7C6             |
| Anti-ANP, rabbit                                                    | Novus Biologicals #NBP2-14872  |
| Anti-Lys63-linkage specific polyubiquitin antibody, rabbit          | Cell signaling, #5621          |
| Anti-GAPDH rabbit                                                   | Abcam, ab37168                 |
| Anti-GAPDH mouse                                                    | Abcam, ab8245                  |
| Anti-p-Akt (Ser 473), rabbit                                        | Cell Signaling, #9271          |
| Anti-Akt (Pan), rabbit                                              | Cell Signaling, #4691          |
| <b>Secondary antibody</b>                                           |                                |
| IRDye® 800CW Donkey anti-mouse                                      | Licor, 926-32212               |
| IRDye® 800CW Goat anti-rabbit                                       | Licor, 926-32211               |
| IRDye® 680LT Donkey anti-mouse                                      | Licor, 926-68022               |
| IRDye® 680LT Goat anti-rabbit                                       | Licor, 926-68021               |

**Supplemental Table 4:** Primer sequences.

|               |                     | Forward Primer 5'-3'     | Reverse Primer 5'-3'     |
|---------------|---------------------|--------------------------|--------------------------|
| <i>RefSeq</i> | <i>Mus Musculus</i> |                          |                          |
| NM_009735.3   | mmB2M               | CTGCTACGTAACACAGTTCCACCC | CATGATGCTTGATCACATGTCTCG |
| NM_008725.3   | mmANP               | AGGAGAAGATGCCGGTAGAAGA   | GCTTCCTCAGTCTGCTCACTCA   |
| NM_008726.6   | mmBNP               | CACCGCTGGGAGGTCACT       | GTGAGGCCTTGGTCCTTCAA     |
| NM_025735.3   | mmLC3               | GACCAGCACCCAGTAAGAT      | TGGGACCAGAAACTTGGTCT     |
| NM_008084.3   | mmGAPDH             | GGGTGTGAACCACGAGAAAT     | GTCTTCTGGGTGGCAGTGAT     |
| NM_013556.2   | mmHrpt1             | GCAGTCCCAGCGTCGTG        | GGCCTCCCATCTCCTTCAT      |
| NM_009438.5   | mmRpl13a            | GTTCGGCTGAAGCCTACCAG     | TTCGTAACCTCAAGATCTGCT    |

B2M= $\beta$ -2-microglobulin, ANP= natriuretic peptide A, BNP=natriuretic peptide B. LC3 = Microtubule-associated proteins 1A/1B light chain 3B normalized to GAPDH = Glycerinaldehyd-3-phosphat-Dehydrogenase, Hrpt1= Hypoxanthine-guanine phosphoribosyltransferase, Rpl13a = Ribosomal Protein L13a

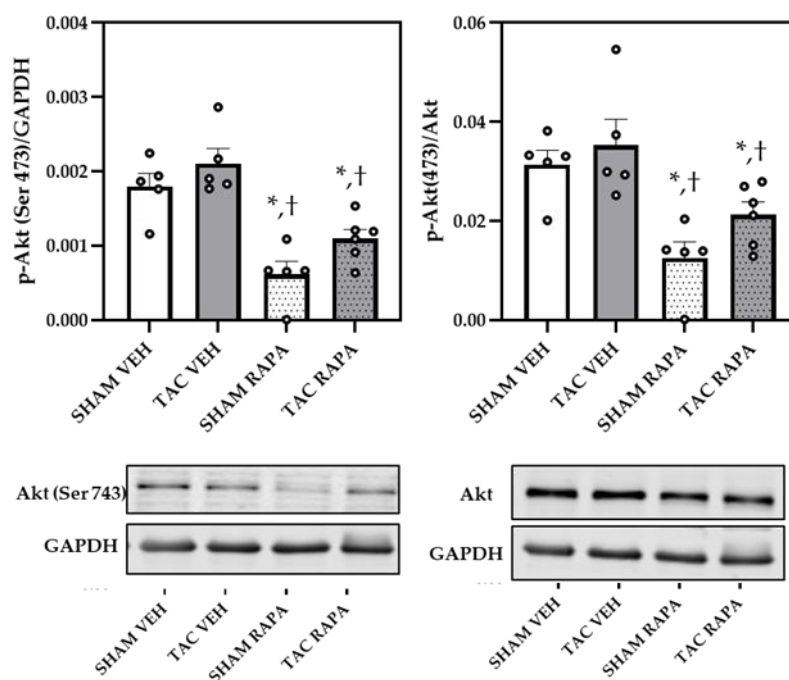

**Supplemental Figure 1: Detection of Akt-Ser 473 in TAC heart tissue.** Data are presented as Mean+SEM of biological replicates. Statistical analyses were performed by two-way-ANOVA followed by Tukey's. Statistically significant differences were shown by  $p < 0.05$ , \* vs. SHAM VEH and † vs. TAC VEH.

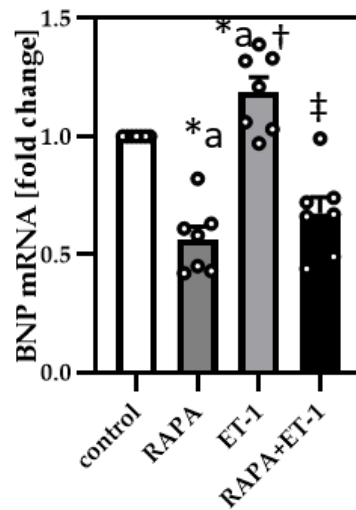

### Supplemental Figure 2: BNP mRNA expression

Data are presented as fold change of control and shown as Mean+SEM of biological replicates. Statistical analyses were performed by either one-way-ANOVA followed by Tukey's posttest or one sample t-test (indicated with a), directly comparing two certain samples. Statistically significant differences were shown by  $p < 0.05$ , \* vs. control, † vs. RAPA and ‡ vs ET-1.
